# Supplementary material for: Genetic Determinants of Long-Term Changes in Blood Lipid Concentrations: 10-Year Follow-Up of the GLACIER Study
Source: PubMed Central journal article supplement (PMC4055682; doi:10.1371/journal.pgen.1004388), 2014-06-12

## Text S1 – Cross-sectional analyses results in GLACIER

In the cross-sectional analyses, 48% (36/75) of the TC SNPs, 30% (13/43) of the TG SNPs, 33% (19/58) of the LDL-C SNPs and 14% (10/73) of the HDL-C SNPs were significantly associated ( $P < 0.05$ ) with their corresponding traits (Appendix Table). 90% (68/75) of the TC SNPs, 93% (40/43) of the TG SNPs, 84% (49/58) of the LDL-C SNPs and 75% (55/73) of the HDL-C SNPs had directionally consistent beta-coefficients as reported previously. [1] The trait-specific GRSs showed associations in a manner consistent with the published literature ( $\beta = 0.05$  mmol/l per allele, 95% CI= 0.04, 0.06, SE=0.003,  $P = 3.01 \times 10^{-67}$  for TC;  $\beta = 0.03$  mmol/l per allele, 95% CI= 0.02, 0.04, SE=0.003,  $P = 4.58 \times 10^{-23}$  for TG;  $\beta = 0.05$  mmol/l per allele, 95% CI= 0.04, 0.06, SE=0.005,  $P = 2.44 \times 10^{-28}$  for LDL-C;  $\beta = -0.01$  mmol/l per allele, 95% CI= -0.012, -0.008, SE=0.001,  $P = 1.35 \times 10^{-11}$  for HDL-C). Using the wGRS strengthened the associations ( $\beta = 0.06$  mmol/l per allele, 95% CI= 0.05, 0.07, SE=0.003,  $P = 2.43 \times 10^{-101}$  for TC;  $\beta = 0.02$  mmol/l per allele, 95% CI= 0.018, 0.022, SE=0.001,  $P = 4.24 \times 10^{-41}$  for TG;  $\beta = 0.06$  mmol/l per allele, 95% CI= 0.05, 0.07, SE=0.004,  $P = 1.17 \times 10^{-50}$  for LDL-C;  $\beta = -0.01$  mmol/l per allele, 95% CI= -0.012, -0.008, SE=0.001,  $P = 7.06 \times 10^{-22}$  for HDL-C) (Text S1 Figure A-D). The differences between the highest and lowest quartiles of the GRS were 0.65 mmol/l for TC, 0.30 mmol/l for TG, 0.59 mmol/l for LDL-C and -0.14 mmol/l for HDL-C.

## References

1. Global Lipids Genetics, C., et al., *Discovery and refinement of loci associated with lipid levels*. Nat Genet, 2013.

**Text S1 Table.** Cross-sectional associations of previously associated SNPs in the GLACIER Study

| Trait | SNP        | EA | EAF  | $\beta$ (95% CI) (mmol/l) | P                    |
|-------|------------|----|------|---------------------------|----------------------|
| HDL-C | rs10019888 | G  | 0,14 | 0,005 (-0,025; 0,034)     | 0,75                 |
| HDL-C | rs1042034  | T  | 0,79 | -0,023 (-0,048; 0,003)    | 0,08                 |
| HDL-C | rs10773003 | G  | 0,85 | -0,006 (-0,034; 0,023)    | 0,70                 |
| HDL-C | rs1084651  | G  | 0,84 | 0,024 (-0,003; 0,051)     | 0,08                 |
| HDL-C | rs10850443 | G  | 0,49 | -0,004 (-0,025; 0,017)    | 0,70                 |
| HDL-C | rs11057408 | G  | 0,64 | -0,001 (-0,022; 0,02)     | 0,92                 |
| HDL-C | rs1121980  | A  | 0,43 | -0,023 (-0,043; -0,002)   | 0,03                 |
| HDL-C | rs11246602 | T  | 0,87 | -0,008 (-0,038; 0,023)    | 0,62                 |
| HDL-C | rs11613352 | C  | 0,71 | -0,026 (-0,048; -0,003)   | 0,02                 |
| HDL-C | rs11869286 | G  | 0,31 | -0,004 (-0,026; 0,018)    | 0,71                 |
| HDL-C | rs12145743 | T  | 0,71 | -0,008 (-0,031; 0,014)    | 0,48                 |
| HDL-C | rs12328675 | T  | 0,90 | -0,001 (-0,035; 0,033)    | 0,97                 |
| HDL-C | rs12678919 | A  | 0,92 | -0,009 (-0,046; 0,028)    | 0,63                 |
| HDL-C | rs12748152 | T  | 0,10 | -0,012 (-0,046; 0,022)    | 0,48                 |
| HDL-C | rs12801636 | G  | 0,75 | -0,014 (-0,038; 0,009)    | 0,23                 |
| HDL-C | rs12967135 | A  | 0,25 | -0,002 (-0,026; 0,021)    | 0,86                 |
| HDL-C | rs13107325 | T  | 0,03 | -0,042 (-0,102; 0,018)    | 0,17                 |
| HDL-C | rs13326165 | G  | 0,80 | -0,025 (-0,051; 0,001)    | 0,06                 |
| HDL-C | rs1532085  | G  | 0,56 | -0,054 (-0,075; -0,034)   | 1.8×10 <sup>-7</sup> |
| HDL-C | rs1689800  | G  | 0,33 | -0,03 (-0,052; -0,008)    | 0,01                 |
| HDL-C | rs16942887 | G  | 0,86 | -0,008 (-0,037; 0,022)    | 0,62                 |
| HDL-C | rs17145738 | C  | 0,86 | 0,011 (-0,019; 0,041)     | 0,48                 |
| HDL-C | rs17173637 | C  | 0,14 | -0,005 (-0,035; 0,025)    | 0,76                 |
| HDL-C | rs17404153 | G  | 0,90 | 0,014 (-0,021; 0,048)     | 0,45                 |
| HDL-C | rs174546   | T  | 0,34 | 0,008 (-0,014; 0,029)     | 0,48                 |
| HDL-C | rs17695224 | A  | 0,23 | -0,014 (-0,038; 0,01)     | 0,26                 |
| HDL-C | rs1800961  | T  | 0,05 | -0,03 (-0,075; 0,016)     | 0,20                 |
| HDL-C | rs181362   | T  | 0,24 | -0,02 (-0,044; 0,004)     | 0,10                 |
| HDL-C | rs1883025  | T  | 0,25 | -0,02 (-0,043; 0,004)     | 0,10                 |
| HDL-C | rs1936800  | T  | 0,55 | -0,011 (-0,032; 0,009)    | 0,29                 |
| HDL-C | rs2013208  | C  | 0,52 | -0,011 (-0,032; 0,009)    | 0,27                 |
| HDL-C | rs2278236  | G  | 0,50 | 0,002 (-0,019; 0,022)     | 0,88                 |
| HDL-C | rs2290547  | A  | 0,23 | -0,013 (-0,037; 0,011)    | 0,29                 |
| HDL-C | rs2293889  | T  | 0,38 | -0,009 (-0,03; 0,011)     | 0,37                 |
| HDL-C | rs2602836  | G  | 0,53 | 0,003 (-0,017; 0,024)     | 0,76                 |
| HDL-C | rs2606736  | T  | 0,62 | 0,005 (-0,016; 0,026)     | 0,61                 |
| HDL-C | rs2652834  | A  | 0,20 | -0,008 (-0,033; 0,017)    | 0,53                 |
| HDL-C | rs2814944  | A  | 0,13 | -0,023 (-0,054; 0,007)    | 0,13                 |
| HDL-C | rs2923084  | G  | 0,19 | -0,025 (-0,052; 0,002)    | 0,07                 |
| HDL-C | rs2925979  | T  | 0,32 | -0,003 (-0,025; 0,019)    | 0,80                 |
| HDL-C | rs2954029  | A  | 0,52 | -0,013 (-0,033; 0,008)    | 0,22                 |

|       |            |   |      |                                       |                       |
|-------|------------|---|------|---------------------------------------|-----------------------|
| HDL-C | rs2972146  | T | 0,59 | 0,002 (-0,019; 0,022)                 | 0,88                  |
| HDL-C | rs3136441  | T | 0,89 | $-2 \times 10^{-4}$ (-0,033; 0,033)   | 0,99                  |
| HDL-C | rs3764261  | C | 0,64 | -0,07 (-0,091; -0,049)                | $1.5 \times 10^{-10}$ |
| HDL-C | rs3822072  | A | 0,46 | 0,005 (-0,016; 0,025)                 | 0,66                  |
| HDL-C | rs386000   | G | 0,73 | -0,006 (-0,029; 0,017)                | 0,63                  |
| HDL-C | rs4129767  | G | 0,50 | -0,021 (-0,041; 0)                    | 0,05                  |
| HDL-C | rs4142995  | T | 0,35 | 0,003 (-0,018; 0,024)                 | 0,79                  |
| HDL-C | rs4148008  | G | 0,33 | 0,001 (-0,021; 0,023)                 | 0,92                  |
| HDL-C | rs4420638  | G | 0,21 | -0,004 (-0,03; 0,021)                 | 0,74                  |
| HDL-C | rs4650994  | A | 0,52 | 0,004 (-0,016; 0,024)                 | 0,70                  |
| HDL-C | rs4660293  | G | 0,24 | -0,003 (-0,027; 0,022)                | 0,82                  |
| HDL-C | rs4731702  | C | 0,48 | -0,012 (-0,032; 0,009)                | 0,26                  |
| HDL-C | rs4846914  | G | 0,43 | -0,014 (-0,035; 0,007)                | 0,18                  |
| HDL-C | rs4917014  | T | 0,74 | 0,005 (-0,018; 0,029)                 | 0,65                  |
| HDL-C | rs4983559  | A | 0,62 | -0,018 (-0,039; 0,003)                | 0,09                  |
| HDL-C | rs499974   | A | 0,18 | -0,012 (-0,038; 0,015)                | 0,39                  |
| HDL-C | rs581080   | G | 0,20 | -0,028 (-0,053; -0,002)               | 0,03                  |
| HDL-C | rs6065906  | C | 0,22 | -0,001 (-0,026; 0,023)                | 0,93                  |
| HDL-C | rs634869   | T | 0,42 | $-3.8 \times 10^{-4}$ (-0,021; 0,021) | 0,97                  |
| HDL-C | rs6450176  | A | 0,25 | -0,025 (-0,049; -0,002)               | 0,03                  |
| HDL-C | rs6589564  | C | 0,06 | -0,025 (-0,068; 0,018)                | 0,25                  |
| HDL-C | rs6805251  | C | 0,56 | -0,011 (-0,032; 0,009)                | 0,28                  |
| HDL-C | rs702485   | A | 0,52 | 0,001 (-0,019; 0,022)                 | 0,92                  |
| HDL-C | rs7134375  | C | 0,57 | -0,005 (-0,026; 0,015)                | 0,61                  |
| HDL-C | rs7240405  | A | 0,17 | -0,019 (-0,046; 0,008)                | 0,17                  |
| HDL-C | rs731839   | G | 0,35 | 0,01 (-0,011; 0,031)                  | 0,37                  |
| HDL-C | rs737337   | C | 0,14 | -0,01 (-0,04; 0,02)                   | 0,50                  |
| HDL-C | rs7941030  | T | 0,62 | -0,001 (-0,022; 0,02)                 | 0,91                  |
| HDL-C | rs838880   | T | 0,63 | -0,025 (-0,046; -0,004)               | 0,02                  |
| HDL-C | rs970548   | A | 0,69 | 0,008 (-0,014; 0,03)                  | 0,48                  |
| HDL-C | rs998584   | A | 0,49 | -0,001 (-0,021; 0,02)                 | 0,96                  |
| HDL-C | rs9987289  | A | 0,12 | -0,048 (-0,08; -0,016)                | $3.4 \times 10^{-3}$  |
| LDL-C | rs10102164 | A | 0,22 | 0,027 (-0,042; 0,097)                 | 0,45                  |
| LDL-C | rs10401969 | T | 0,92 | 0,133 (0,022; 0,243)                  | 0,02                  |
| LDL-C | rs10490626 | G | 0,93 | 0,14 (0,023; 0,258)                   | 0,02                  |
| LDL-C | rs11065987 | A | 0,61 | -0,008 (-0,068; 0,051)                | 0,79                  |
| LDL-C | rs11220462 | A | 0,17 | 0,09 (0,012; 0,167)                   | 0,02                  |
| LDL-C | rs11563251 | T | 0,10 | -0,032 (-0,131; 0,066)                | 0,52                  |
| LDL-C | rs1169288  | C | 0,39 | 0,032 (-0,028; 0,091)                 | 0,30                  |
| LDL-C | rs12027135 | T | 0,58 | 0,078 (0,02; 0,136)                   | 0,01                  |
| LDL-C | rs1250229  | C | 0,77 | 0,036 (-0,033; 0,104)                 | 0,30                  |
| LDL-C | rs12670798 | C | 0,28 | 0,082 (0,018; 0,145)                  | 0,01                  |
| LDL-C | rs12748152 | T | 0,10 | 0,076 (-0,02; 0,173)                  | 0,12                  |
| LDL-C | rs12916    | C | 0,41 | 0,08 (0,021; 0,139)                   | 0,01                  |
| LDL-C | rs1367117  | A | 0,40 | 0,127 (0,069; 0,185)                  | $1.6 \times 10^{-5}$  |
| LDL-C | rs1564348  | C | 0,15 | 0,043 (-0,041; 0,126)                 | 0,32                  |

|       |            |   |      |                        |                       |
|-------|------------|---|------|------------------------|-----------------------|
| LDL-C | rs17404153 | G | 0,91 | 0,036 (-0,062; 0,134)  | 0,47                  |
| LDL-C | rs174546   | C | 0,66 | 0,068 (0,006; 0,129)   | 0,03                  |
| LDL-C | rs1800562  | G | 0,93 | 0,066 (-0,046; 0,178)  | 0,25                  |
| LDL-C | rs1801689  | C | 0,01 | 0,412 (0,048; 0,775)   | 0,03                  |
| LDL-C | rs2000999  | A | 0,23 | 0,068 (0; 0,136)       | 0,05                  |
| LDL-C | rs2030746  | T | 0,37 | 0,006 (-0,054; 0,066)  | 0,85                  |
| LDL-C | rs2072183  | C | 0,28 | 0,043 (-0,021; 0,107)  | 0,19                  |
| LDL-C | rs2131925  | T | 0,69 | 0,015 (-0,046; 0,077)  | 0,63                  |
| LDL-C | rs2255141  | A | 0,24 | -0,064 (-0,133; 0,005) | 0,07                  |
| LDL-C | rs2326077  | C | 0,35 | 0,031 (-0,03; 0,092)   | 0,32                  |
| LDL-C | rs2328223  | C | 0,18 | 0,012 (-0,062; 0,086)  | 0,76                  |
| LDL-C | rs2479409  | G | 0,36 | 0,051 (-0,009; 0,11)   | 0,10                  |
| LDL-C | rs2642442  | T | 0,70 | 0,047 (-0,018; 0,112)  | 0,16                  |
| LDL-C | rs267733   | A | 0,82 | 0,056 (-0,02; 0,133)   | 0,15                  |
| LDL-C | rs2710642  | A | 0,67 | -0,042 (-0,104; 0,02)  | 0,19                  |
| LDL-C | rs2902940  | A | 0,70 | 0,011 (-0,052; 0,073)  | 0,73                  |
| LDL-C | rs2954029  | A | 0,52 | 0,078 (0,02; 0,135)    | 0,01                  |
| LDL-C | rs314253   | T | 0,59 | 0,042 (-0,017; 0,101)  | 0,16                  |
| LDL-C | rs3177928  | A | 0,12 | 0,07 (-0,017; 0,158)   | 0,11                  |
| LDL-C | rs364585   | G | 0,63 | -0,021 (-0,08; 0,038)  | 0,49                  |
| LDL-C | rs3757354  | C | 0,73 | 0,069 (0,004; 0,133)   | 0,04                  |
| LDL-C | rs3764261  | C | 0,64 | 0,043 (-0,017; 0,104)  | 0,16                  |
| LDL-C | rs3780181  | A | 0,95 | 0,075 (-0,057; 0,208)  | 0,26                  |
| LDL-C | rs3798236  | T | 0,69 | -0,017 (-0,079; 0,045) | 0,59                  |
| LDL-C | rs4253772  | C | 0,92 | -0,002 (-0,105; 0,102) | 0,98                  |
| LDL-C | rs4299376  | G | 0,29 | 0,164 (0,1; 0,227)     | 5×10 <sup>-7</sup>    |
| LDL-C | rs4420638  | G | 0,21 | 0,282 (0,21; 0,354)    | 2.4×10 <sup>-14</sup> |
| LDL-C | rs4530754  | A | 0,47 | -0,021 (-0,079; 0,038) | 0,49                  |
| LDL-C | rs4722551  | C | 0,22 | 0,046 (-0,024; 0,116)  | 0,20                  |
| LDL-C | rs4942486  | T | 0,44 | 0,079 (0,021; 0,137)   | 0,01                  |
| LDL-C | rs558971   | A | 0,56 | 0,067 (0,008; 0,125)   | 0,02                  |
| LDL-C | rs5763662  | T | 0,02 | 0,151 (-0,046; 0,348)  | 0,13                  |
| LDL-C | rs6065311  | C | 0,48 | 0,046 (-0,012; 0,104)  | 0,12                  |
| LDL-C | rs629301   | T | 0,75 | 0,113 (0,047; 0,179)   | 8.2×10 <sup>-4</sup>  |
| LDL-C | rs6504872  | T | 0,44 | 0,01 (-0,048; 0,067)   | 0,74                  |
| LDL-C | rs6511720  | G | 0,93 | 0,354 (0,242; 0,467)   | 6.8×10 <sup>-10</sup> |
| LDL-C | rs6589564  | C | 0,06 | 0,088 (-0,034; 0,21)   | 0,16                  |
| LDL-C | rs6831256  | A | 0,64 | 0,039 (-0,021; 0,099)  | 0,20                  |
| LDL-C | rs6882076  | C | 0,63 | 0,062 (0,003; 0,121)   | 0,04                  |
| LDL-C | rs7640978  | C | 0,91 | -0,016 (-0,118; 0,086) | 0,76                  |
| LDL-C | rs7832643  | T | 0,40 | 0,033 (-0,027; 0,093)  | 0,28                  |
| LDL-C | rs8017377  | A | 0,47 | 0,024 (-0,035; 0,082)  | 0,43                  |
| LDL-C | rs9411489  | T | 0,16 | 0,084 (0,006; 0,161)   | 0,03                  |
| LDL-C | rs9987289  | G | 0,88 | 0,03 (-0,06; 0,121)    | 0,51                  |
| TC    | rs10102164 | A | 0,23 | 0,029 (-0,022; 0,079)  | 0,27                  |
| TC    | rs10128711 | C | 0,74 | -0,004 (-0,052; 0,045) | 0,88                  |

|    |            |   |      |                                      |                      |
|----|------------|---|------|--------------------------------------|----------------------|
| TC | rs10401969 | T | 0,92 | 0,169 (0,092; 0,247)                 | 1.8×10 <sup>-5</sup> |
| TC | rs10490626 | A | 0,07 | -0,07 (-0,153; 0,013)                | 0,10                 |
| TC | rs1077514  | T | 0,88 | 0,036 (-0,028; 0,101)                | 0,27                 |
| TC | rs10904908 | G | 0,41 | 0,025 (-0,018; 0,067)                | 0,25                 |
| TC | rs11065987 | A | 0,60 | -0,001 (-0,045; 0,042)               | 0,95                 |
| TC | rs11220462 | A | 0,16 | 0,071 (0,012; 0,129)                 | 0,02                 |
| TC | rs11563251 | T | 0,10 | -0,025 (-0,097; 0,047)               | 0,50                 |
| TC | rs11603023 | T | 0,39 | 0,018 (-0,025; 0,061)                | 0,42                 |
| TC | rs1169288  | C | 0,37 | 0,047 (0,003; 0,092)                 | 0,04                 |
| TC | rs11694172 | G | 0,28 | 0,022 (-0,026; 0,07)                 | 0,37                 |
| TC | rs11709504 | T | 0,77 | 0,044 (-0,006; 0,094)                | 0,09                 |
| TC | rs12027135 | T | 0,58 | 0,079 (0,035; 0,122)                 | 3.6×10 <sup>-4</sup> |
| TC | rs1260326  | T | 0,30 | 0,054 (0,008; 0,1)                   | 0,02                 |
| TC | rs12670798 | C | 0,28 | 0,08 (0,033; 0,127)                  | 9×10 <sup>-4</sup>   |
| TC | rs12916    | C | 0,41 | 0,08 (0,037; 0,123)                  | 2.9×10 <sup>-4</sup> |
| TC | rs13315871 | G | 0,90 | 0,024 (-0,045; 0,094)                | 0,50                 |
| TC | rs1367117  | A | 0,39 | 0,11 (0,067; 0,154)                  | 6×10 <sup>-7</sup>   |
| TC | rs138777   | A | 0,40 | -0,021 (-0,064; 0,022)               | 0,34                 |
| TC | rs1532085  | A | 0,44 | 0,079 (0,036; 0,121)                 | 3×10 <sup>-4</sup>   |
| TC | rs1564348  | C | 0,14 | 0,065 (0,003; 0,126)                 | 0,04                 |
| TC | rs174546   | C | 0,66 | 0,045 (-0,001; 0,09)                 | 0,05                 |
| TC | rs1800562  | G | 0,93 | 0,143 (0,061; 0,226)                 | 6.6×10 <sup>-4</sup> |
| TC | rs1800961  | C | 0,94 | 0,15 (0,058; 0,241)                  | 1.3×10 <sup>-3</sup> |
| TC | rs1883025  | C | 0,74 | 0,08 (0,032; 0,129)                  | 1×10 <sup>-3</sup>   |
| TC | rs1997243  | G | 0,15 | 0,04 (-0,02; 0,1)                    | 0,19                 |
| TC | rs2000999  | A | 0,23 | 0,055 (0,005; 0,105)                 | 0,03                 |
| TC | rs2030746  | T | 0,38 | 0,019 (-0,024; 0,063)                | 0,39                 |
| TC | rs2072183  | C | 0,28 | 0,053 (0,006; 0,1)                   | 0,03                 |
| TC | rs2131925  | T | 0,68 | 0,072 (0,026; 0,117)                 | 2×10 <sup>-3</sup>   |
| TC | rs2255141  | A | 0,24 | 0,025 (-0,025; 0,075)                | 0,33                 |
| TC | rs2277862  | C | 0,89 | 0,006 (-0,063; 0,074)                | 0,87                 |
| TC | rs2287623  | G | 0,37 | 0,008 (-0,036; 0,052)                | 0,72                 |
| TC | rs2326077  | C | 0,34 | 0,063 (0,018; 0,108)                 | 0,01                 |
| TC | rs2479409  | G | 0,36 | 0,085 (0,041; 0,129)                 | 1.7×10 <sup>-4</sup> |
| TC | rs2642442  | T | 0,71 | 1.4×10 <sup>-5</sup> (-0,047; 0,047) | 1,00                 |
| TC | rs2737229  | A | 0,69 | 0,053 (0,008; 0,099)                 | 0,02                 |
| TC | rs2758886  | A | 0,24 | -0,001 (-0,05; 0,048)                | 0,97                 |
| TC | rs2814982  | C | 0,91 | 0,104 (0,032; 0,177)                 | 5×10 <sup>-3</sup>   |
| TC | rs2902940  | A | 0,71 | 0,005 (-0,041; 0,052)                | 0,83                 |
| TC | rs2954029  | A | 0,53 | 0,092 (0,05; 0,134)                  | 1.8×10 <sup>-5</sup> |
| TC | rs314253   | T | 0,60 | 0,082 (0,039; 0,125)                 | 1.8×10 <sup>-4</sup> |
| TC | rs3177928  | A | 0,12 | 0,102 (0,038; 0,166)                 | 1.9×10 <sup>-3</sup> |
| TC | rs3757354  | C | 0,73 | 0,062 (0,015; 0,109)                 | 0,01                 |
| TC | rs3764261  | A | 0,35 | 0,054 (0,01; 0,098)                  | 0,02                 |
| TC | rs3780181  | A | 0,95 | 0,043 (-0,055; 0,142)                | 0,39                 |

|      |            |   |      |                        |                       |
|------|------------|---|------|------------------------|-----------------------|
| TC   | rs3798236  | T | 0,70 | 0,007 (-0,039; 0,053)  | 0,77                  |
| TC   | rs4253772  | T | 0,08 | 0,036 (-0,041; 0,112)  | 0,36                  |
| TC   | rs4299376  | G | 0,28 | 0,149 (0,102; 0,195)   | 3.9×10 <sup>-10</sup> |
| TC   | rs4420638  | G | 0,20 | 0,239 (0,186; 0,292)   | 9.9×10 <sup>-19</sup> |
| TC   | rs4530754  | A | 0,48 | 0,019 (-0,023; 0,062)  | 0,38                  |
| TC   | rs4722551  | C | 0,21 | 0,007 (-0,045; 0,059)  | 0,80                  |
| TC   | rs4883201  | A | 0,92 | 0,037 (-0,044; 0,117)  | 0,37                  |
| TC   | rs4921914  | C | 0,21 | 0,033 (-0,019; 0,084)  | 0,22                  |
| TC   | rs492602   | G | 0,42 | 0,034 (-0,008; 0,077)  | 0,11                  |
| TC   | rs558971   | A | 0,55 | 0,057 (0,014; 0,099)   | 0,01                  |
| TC   | rs581080   | C | 0,80 | 0,029 (-0,024; 0,082)  | 0,28                  |
| TC   | rs6065311  | C | 0,49 | 0,056 (0,014; 0,098)   | 0,01                  |
| TC   | rs629301   | T | 0,75 | 0,089 (0,04; 0,138)    | 3.5×10 <sup>-4</sup>  |
| TC   | rs6504872  | T | 0,44 | 0,011 (-0,031; 0,053)  | 0,62                  |
| TC   | rs6511720  | G | 0,92 | 0,247 (0,169; 0,325)   | 6×10 <sup>-10</sup>   |
| TC   | rs6589564  | C | 0,06 | 0,201 (0,113; 0,29)    | 8.6×10 <sup>-6</sup>  |
| TC   | rs6603981  | T | 0,78 | 0,066 (0,015; 0,117)   | 0,01                  |
| TC   | rs6831256  | A | 0,63 | 0,028 (-0,016; 0,071)  | 0,22                  |
| TC   | rs6882076  | C | 0,62 | 0,032 (-0,011; 0,076)  | 0,14                  |
| TC   | rs7240405  | G | 0,84 | 0,091 (0,034; 0,148)   | 1.7×10 <sup>-3</sup>  |
| TC   | rs7570971  | A | 0,26 | 0,037 (-0,012; 0,085)  | 0,14                  |
| TC   | rs7640978  | C | 0,91 | 0,05 (-0,026; 0,125)   | 0,20                  |
| TC   | rs7832643  | T | 0,39 | 0,065 (0,021; 0,109)   | 3.8×10 <sup>-3</sup>  |
| TC   | rs7941030  | C | 0,38 | 0,029 (-0,015; 0,072)  | 0,19                  |
| TC   | rs9376090  | T | 0,66 | 0,025 (-0,02; 0,069)   | 0,28                  |
| TC   | rs9411489  | T | 0,16 | 0,116 (0,06; 0,173)    | 5.5×10 <sup>-5</sup>  |
| TC   | rs970548   | A | 0,69 | -0,015 (-0,06; 0,031)  | 0,53                  |
| TC   | rs9987289  | G | 0,89 | 0,032 (-0,038; 0,101)  | 0,37                  |
| lnTG | rs10195252 | T | 0,58 | 0,005 (-0,012; 0,022)  | 0,57                  |
| lnTG | rs10401969 | T | 0,92 | 0,048 (0,016; 0,08)    | 3.5×10 <sup>-3</sup>  |
| lnTG | rs1042034  | T | 0,80 | 0,031 (0,01; 0,052)    | 3.7×10 <sup>-3</sup>  |
| lnTG | rs10761741 | A | 0,63 | 0,014 (-0,003; 0,031)  | 0,11                  |
| lnTG | rs11057408 | G | 0,63 | 0,015 (-0,002; 0,032)  | 0,09                  |
| lnTG | rs1121980  | G | 0,56 | -0,014 (-0,031; 0,002) | 0,09                  |
| lnTG | rs11613352 | C | 0,71 | 0,017 (-0,001; 0,035)  | 0,07                  |
| lnTG | rs11776767 | C | 0,35 | 0,008 (-0,011; 0,028)  | 0,41                  |
| lnTG | rs1260326  | T | 0,30 | 0,054 (0,036; 0,072)   | 4.5×10 <sup>-9</sup>  |
| lnTG | rs12678919 | A | 0,92 | 0,042 (0,011; 0,073)   | 0,01                  |
| lnTG | rs12748152 | T | 0,10 | 0,008 (-0,02; 0,035)   | 0,59                  |
| lnTG | rs13238203 | C | 0,00 | -                      | -                     |
| lnTG | rs1532085  | A | 0,45 | 0,007 (-0,01; 0,024)   | 0,41                  |
| lnTG | rs17145738 | C | 0,87 | 0,032 (0,008; 0,057)   | 0,01                  |
| lnTG | rs174546   | T | 0,34 | 0,014 (-0,003; 0,032)  | 0,11                  |
| lnTG | rs1832007  | A | 0,81 | 0,015 (-0,006; 0,036)  | 0,16                  |
| lnTG | rs1936800  | T | 0,55 | 0,009 (-0,008; 0,026)  | 0,29                  |

|      |           |   |      |                        |                      |
|------|-----------|---|------|------------------------|----------------------|
| lnTG | rs2068888 | G | 0,54 | 0,028 (0,011; 0,045)   | 1.1×10 <sup>-3</sup> |
| lnTG | rs2131925 | T | 0,69 | 0,023 (0,005; 0,041)   | 0,01                 |
| lnTG | rs2247056 | C | 0,74 | 0,008 (-0,011; 0,027)  | 0,41                 |
| lnTG | rs2412710 | A | 0,02 | 0,037 (-0,019; 0,092)  | 0,20                 |
| lnTG | rs2954029 | A | 0,53 | 0,046 (0,03; 0,062)    | 3.6×10 <sup>-8</sup> |
| lnTG | rs2972146 | T | 0,59 | 0,01 (-0,007; 0,027)   | 0,24                 |
| lnTG | rs3198697 | C | 0,57 | 0,013 (-0,004; 0,03)   | 0,13                 |
| lnTG | rs3764261 | C | 0,65 | 0,015 (-0,002; 0,032)  | 0,09                 |
| lnTG | rs38855   | A | 0,52 | 0,014 (-0,002; 0,031)  | 0,08                 |
| lnTG | rs439401  | C | 0,64 | 0,027 (0,01; 0,045)    | 1.6×10 <sup>-3</sup> |
| lnTG | rs442177  | T | 0,53 | 0,014 (-0,002; 0,031)  | 0,09                 |
| lnTG | rs4722551 | C | 0,21 | 0,003 (-0,017; 0,024)  | 0,75                 |
| lnTG | rs4846914 | G | 0,44 | 0,004 (-0,013; 0,021)  | 0,64                 |
| lnTG | rs4889606 | A | 0,62 | -0,008 (-0,026; 0,009) | 0,34                 |
| lnTG | rs4921914 | C | 0,21 | 0,025 (0,005; 0,046)   | 0,02                 |
| lnTG | rs5756931 | T | 0,58 | 0,005 (-0,012; 0,022)  | 0,59                 |
| lnTG | rs6065906 | C | 0,22 | 0,022 (0,002; 0,041)   | 0,03                 |
| lnTG | rs645040  | T | 0,82 | 0,016 (-0,005; 0,037)  | 0,14                 |
| lnTG | rs6589564 | C | 0,06 | 0,098 (0,064; 0,133)   | 1.7×10 <sup>-8</sup> |
| lnTG | rs6831256 | G | 0,37 | 0,017 (-0,001; 0,034)  | 0,06                 |
| lnTG | rs6882076 | C | 0,62 | 0,003 (-0,014; 0,02)   | 0,73                 |
| lnTG | rs7248104 | G | 0,59 | 0,029 (0,012; 0,046)   | 8.8×10 <sup>-4</sup> |
| lnTG | rs731839  | G | 0,36 | 0,012 (-0,006; 0,029)  | 0,19                 |
| lnTG | rs8077889 | C | 0,17 | 0,014 (-0,008; 0,035)  | 0,22                 |
| lnTG | rs9686661 | T | 0,16 | 0,011 (-0,012; 0,034)  | 0,36                 |
| lnTG | rs998584  | A | 0,50 | 0,006 (-0,01; 0,023)   | 0,46                 |

95% CI - 95% confidence interval;  $\beta$  - beta coefficient; EA - effect allele; EAF - effect allele frequency; HDL-C - high density lipoprotein cholesterol; LDL-C - low density lipoprotein cholesterol; lnTG - natural logarithm of triglyceride; SE - standard error; TC - total cholesterol. *P* values are based on linear regression models, SNP associations were tested by fitting the previously associated individual variants (additive model) as the independent variables with lipid traits as dependent variables. We did not correct for multiple testing in these models given prior evidence of association.

Text S1 Figure A-D

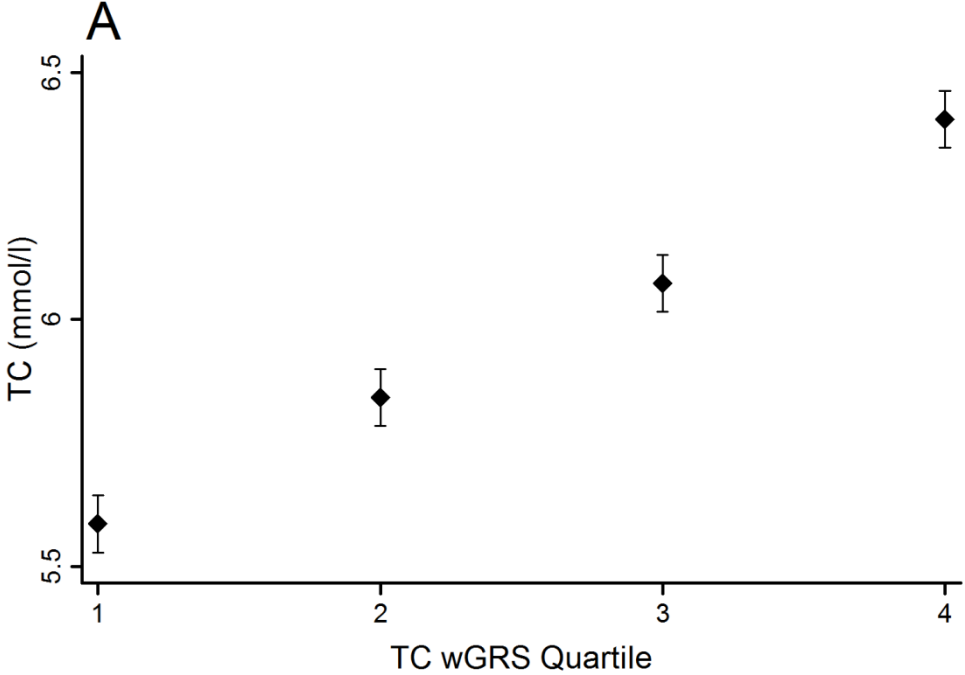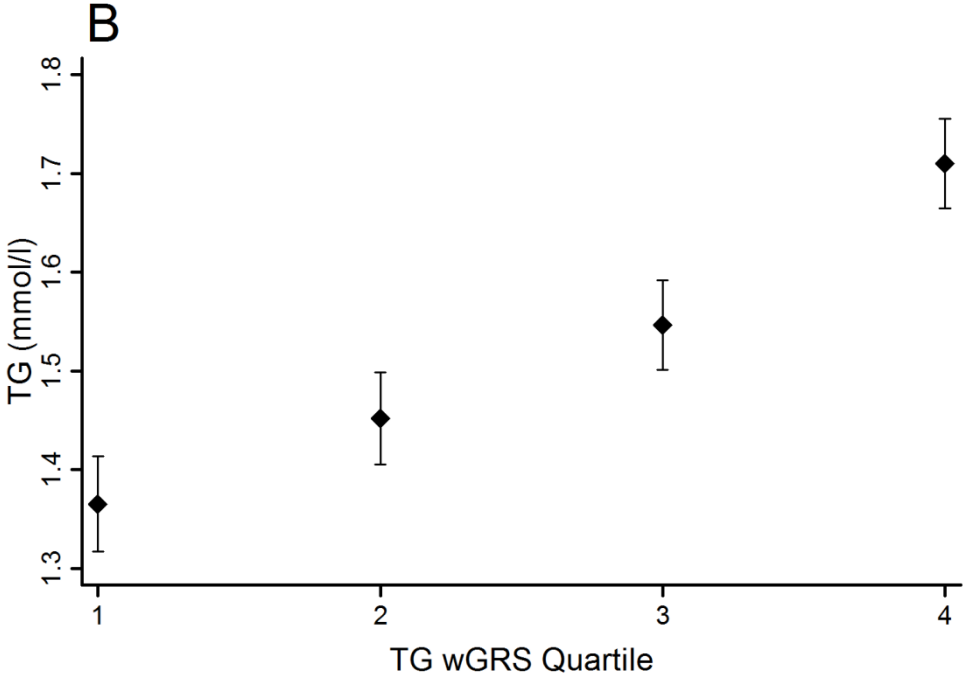



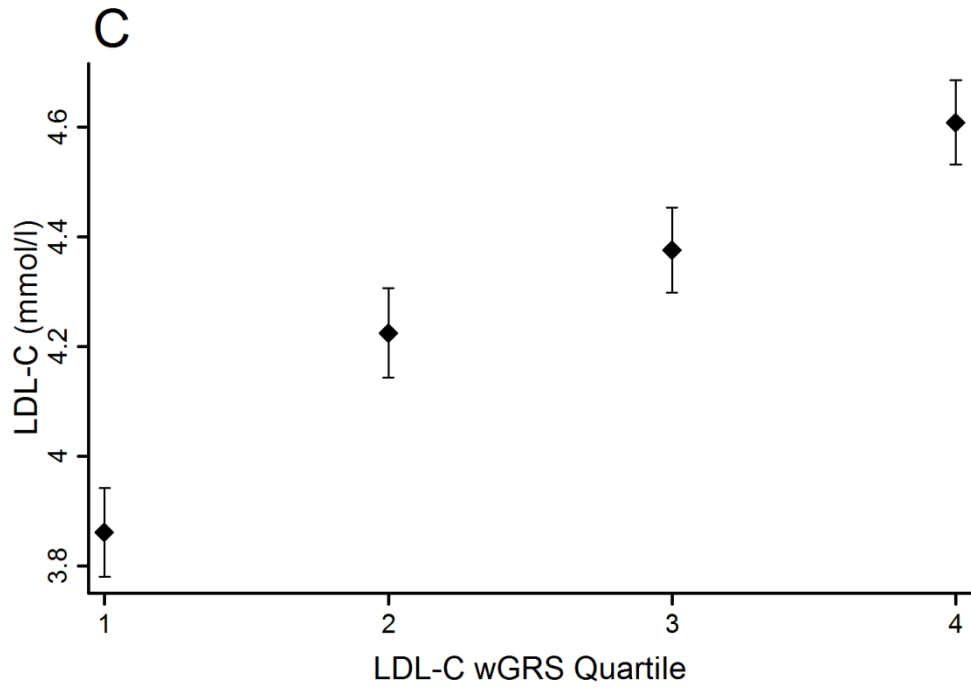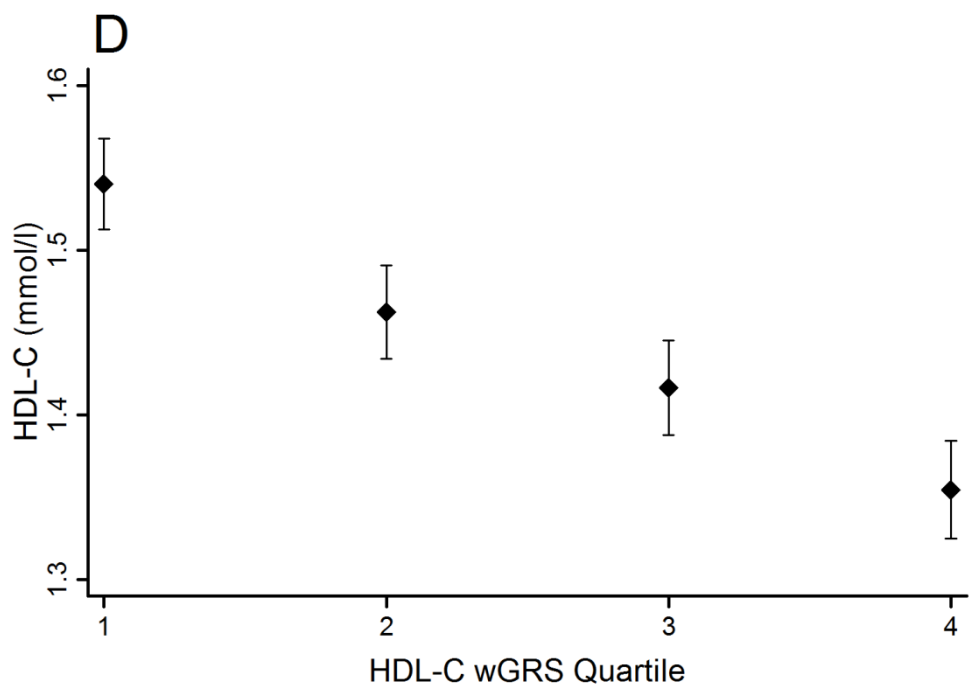

Supplement: pgen.1004388.s005.pdf [file pgen.1004388.s005.pdf]
